# Supplementary material
Source: MDPI journal article supplement (https://www.mdpi.com/2073-4395/11/10/2085)
Supplement: s1 [file s1]

**Table S1.** Coefficient (r) for the correlations between the relative abundances of taxonomic groups and soil physicochemical properties.

| Taxa   |                            | Total N | SOM      | pH      | EC        |
|--------|----------------------------|---------|----------|---------|-----------|
| Phyla  | Proteobacteria             | -0.079  | -0.339   | -0.068  | -0.576    |
|        | Verrucomicrobia            | 0.099   | 0.279    | 0.112   | 0.600 *   |
|        | Cyanobacteria              | -0.208  | -0.203   | -0.088  | -0.427    |
|        | Actinobacteria             | -0.219  | -0.218   | -0.170  | -0.430    |
| Class  | Alphaproteobacteria        | -0.246  | -0.680 * | 0.357   | -0.518    |
|        | Deltaproteobacteria        | 0.288   | 0.704 *  | -0.403  | 0.498     |
|        | Betaproteobacteria         | -0.480  | -0.489   | 0.287   | -0.410    |
|        | Opitutae                   | 0.099   | 0.279    | 0.112   | 0.600 *   |
|        | Gammaproteobacteria        | 0.186   | 0.506    | -0.291  | 0.359     |
| Family | <i>Bradyrhizobiaceae</i>   | -0.279  | -0.685 * | 0.314   | -0.576 *  |
|        | <i>Geobacteraceae</i>      | 0.249   | 0.633 *  | -0.370  | 0.412     |
|        | <i>Desulfuromonadaceae</i> | 0.269   | 0.670 *  | -0.343  | 0.580 *   |
|        | <i>Rhodospirillaceae</i>   | 0.148   | 0.325    | -0.082  | 0.370     |
|        | <i>Opitutaceae</i>         | 0.084   | 0.219    | 0.133   | 0.587 *   |
|        | <i>Comamonadaceae</i>      | -0.265  | -0.316   | 0.250   | 0.040     |
|        | <i>Desulfovibrionaceae</i> | 0.224   | 0.423    | -0.362  | 0.125     |
|        | <i>Phyllobacteriaceae</i>  | -0.156  | -0.428   | 0.577 * | -0.108    |
|        | <i>Burkholderiaceae</i>    | -0.357  | -0.579 * | 0.037   | -0.755 ** |
| Genus  | <i>Bradyrhizobium</i>      | -0.279  | -0.685 * | 0.314   | -0.576 *  |
|        | <i>Geobacter</i>           | 0.249   | 0.633 *  | -0.370  | 0.412     |
|        | <i>Desulfuromonas</i>      | 0.274   | 0.663 *  | -0.356  | 0.578 *   |
|        | <i>Azospirillum</i>        | 0.078   | 0.315    | -0.063  | 0.408     |
|        | <i>Desulfovibrio</i>       | 0.117   | 0.244    | -0.360  | -0.096    |
|        | <i>Mesorhizobium</i>       | -0.156  | -0.428   | 0.577 * | -0.108    |
|        | <i>Pseudacidovorax</i>     | -0.444  | -0.526   | 0.396   | -0.177    |
|        | <i>Rhodoplanes</i>         | 0.029   | -0.270   | 0.225   | -0.201    |
|        | <i>Azotobacter</i>         | 0.158   | 0.430    | -0.277  | 0.256     |
|        | <i>Sagittula</i>           | 0.263   | 0.338    | -0.280  | 0.172     |

\*:  $p < 0.05$ ; \*\*:  $p < 0.01$
