# Supplementary material
Source: MDPI journal article supplement (https://www.mdpi.com/2073-4395/11/10/2085)
Supplement: s1 [file s1 › Figure S1.pdf]

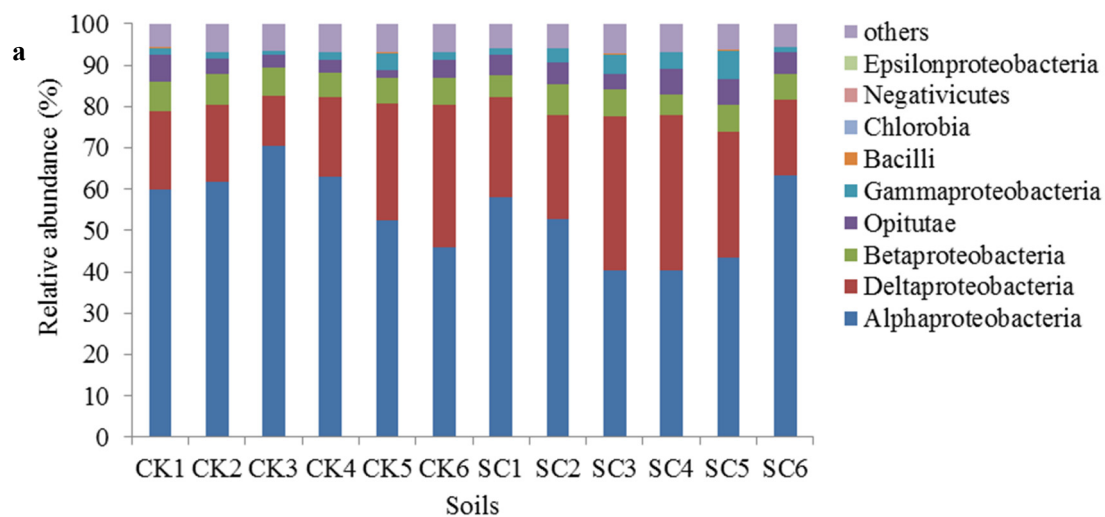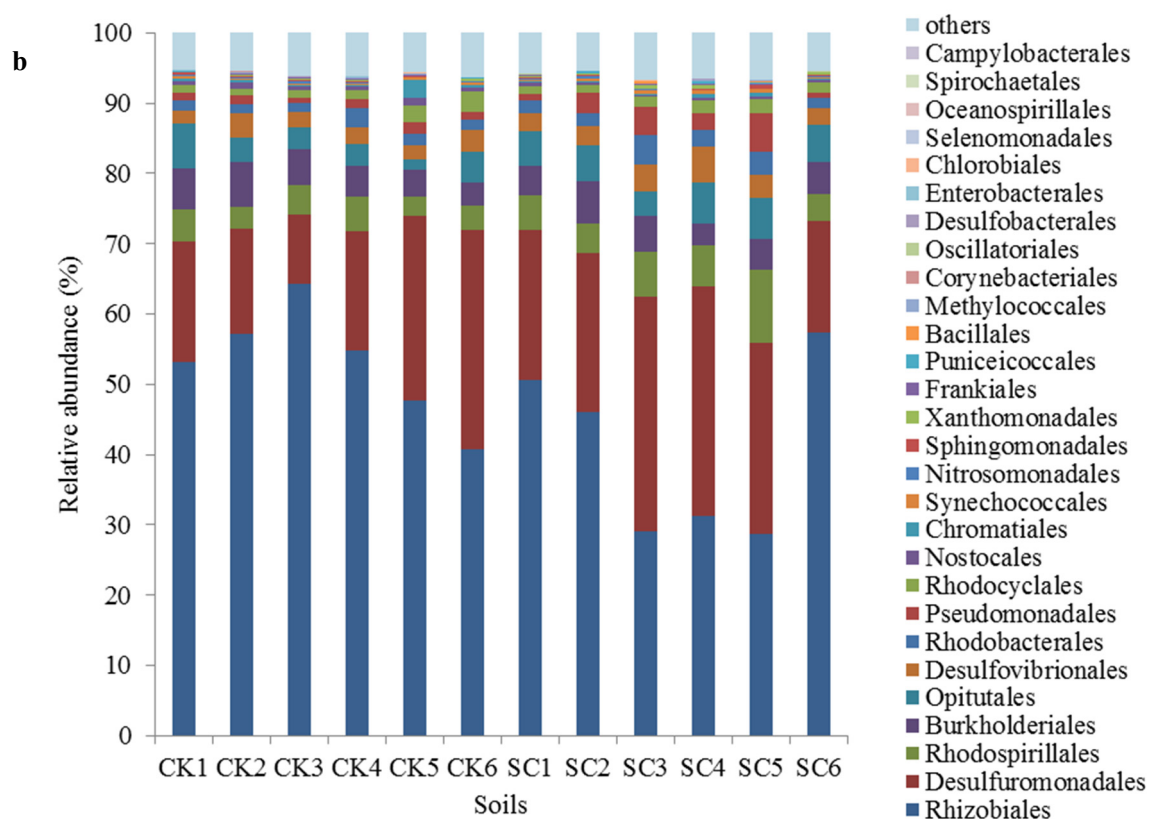

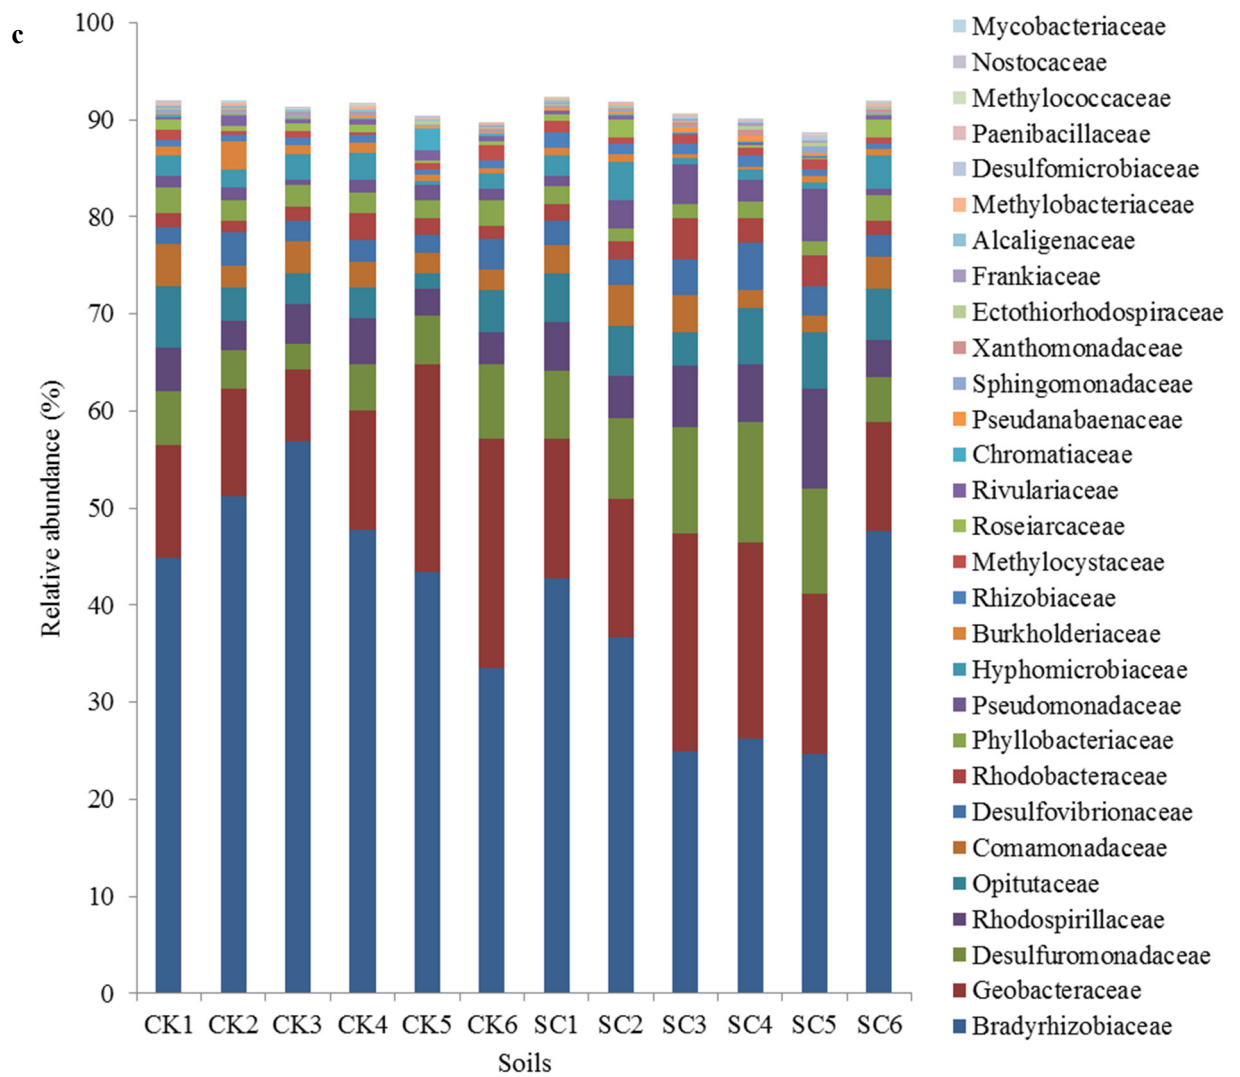

**Figure S1.** Relative abundances of taxonomic groups in SC and CK. Abbreviations: SC, grasslands invaded by *Stellera chamaejasme* L.; CK, uninvaded grasslands. (a): class; (b): order; (c): family.
